# Supplementary material
Source: PubMed Central journal article supplement (PMC7832247)
Supplement: mmc1.pdf [file mmc1.pdf]

# THE LANCET

## Respiratory Medicine

### Supplementary appendix

This appendix formed part of the original submission and has been peer reviewed. We post it as supplied by the authors.

Supplement to: Piroth L, Cottenet J, Mariet A-S, et al. Comparison of the characteristics, morbidity, and mortality of COVID-19 and seasonal influenza: a nationwide, population-based retrospective cohort study. *Lancet Respir Med* 2020; published online Dec 17. [http://dx.doi.org/10.1016/S2213-2600\(20\)30527-0](http://dx.doi.org/10.1016/S2213-2600(20)30527-0).

## Supplementary Material

**Supplementary Table 1: Comorbidities and complications in the whole population of patients hospitalized in France for COVID-19 (from March 1<sup>st</sup>, 2020, to April 30<sup>th</sup>, 2020) or seasonal influenza (from December 1<sup>st</sup>, 2018, to February 28<sup>th</sup>, 2019), according to their age at admission**

| <b>COVID-19</b>                                  |              |               |               |                |                |                |                |                |                |
|--------------------------------------------------|--------------|---------------|---------------|----------------|----------------|----------------|----------------|----------------|----------------|
| <b>Age class (years)</b>                         | <18          | 18-30         | 31-40         | 41-50          | 51-60          | 61-70          | 71-80          | 81-90          | >90            |
| N                                                | 1,227        | 4,384         | 6,065         | 8,892          | 13,110         | 15,345         | 16,265         | 17,841         | 6,401          |
| Social deprivation score                         | -0.2 +/- 1.8 | 0.1 +/- 1.9*  | -0.1 +/- 1.8* | -0.2 +/- 1.8\$ | -0.3 +/- 1.8\$ | -0.2 +/- 1.7\$ | -0.3 +/- 1.7\$ | -0.4 +/- 1.8\$ | -0.7 +/- 1.8\$ |
| <b>Comorbidity scores</b>                        |              |               |               |                |                |                |                |                |                |
| Charlson score                                   | 0.2 +/- 0.6* | 0.2 +/- 0.7\$ | 0.3 +/- 1.0\$ | 0.5 +/- 1.3\$  | 0.9 +/- 1.7\$  | 1.4 +/- 2.1\$  | 1.7 +/- 2.1\$  | 1.6 +/- 1.9*   | 1.5 +/- 1.6    |
| Elixhauser score                                 | 0.4 +/- 0.3* | 0.4 +/- 0.8\$ | 0.6 +/- 1.1\$ | 1.0 +/- 1.4\$  | 1.5 +/- 1.7\$  | 2.2 +/- 2.0\$  | 2.7 +/- 2.0    | 2.8 +/- 2.0    | 2.7 +/- 1.9\$  |
| <b>Comorbidities</b>                             |              |               |               |                |                |                |                |                |                |
| Hypertension                                     | 0.5*         | 1.4           | 4.4           | 12.7           | 24.8*          | 37.8*          | 45.8*          | 48.1*          | 48.5*          |
| Dementia                                         | 0.1          | 0             | 0.1           | 0.1            | 0.3\$          | 1.8            | 7.5            | 19.9*          | 25.6*          |
| HIV                                              | 0            | 0.3           | 0.4\$         | 1.0\$          | 1.2\$          | 0.7            | 0.2            | 0.02\$         | 0.02           |
| Heart failure                                    | 1.3*         | 0.5           | 0.7           | 1.0\$          | 2.2\$          | 5.4\$          | 9.6\$          | 16.2\$         | 22.1\$         |
| Chronic respiratory disease                      | 0.8*         | 0.1\$         | 0.3\$         | 0.5\$          | 0.8\$          | 1.8\$          | 2.5\$          | 2.4\$          | 1.9            |
| Chronic kidney disease                           | 0.3          | 0.3\$         | 1.7           | 1.9\$          | 3.6\$          | 7.1\$          | 11.6           | 15.0*          | 16.6           |
| Cirrhosis                                        | 0.1          | 0.1           | 0.1\$         | 0.6\$          | 1.2\$          | 1.4\$          | 1.3            | 0.4            | 0.1            |
| Diabetes                                         | 0.7          | 2.9\$         | 5.7\$         | 9.9            | 17.1           | 25.5*          | 28.8*          | 22.4*          | 13.2           |
| Peripheral vascular disease                      | 0            | 0.2           | 0.1           | 0.6            | 1.5\$          | 3.6\$          | 5.1            | 5.2            | 4.6            |
| Overweight                                       | 1.3*         | 7.6*          | 11.5*         | 15.1*          | 16.4*          | 16.1*          | 11.6*          | 5.9            | 2.4            |
| Body mass index (BMI)                            | 1.0*         | 6.7*          | 10.1*         | 13.1*          | 13.7*          | 13.7*          | 10.0*          | 4.9            | 2.0            |
| Dyslipidemia                                     | 0            | 0.2           | 0.4           | 1.6\$          | 3.8            | 6.9            | 8.4*           | 6.4            | 4.4            |
| Deficiency Anemia                                | 1.7          | 0.8\$         | 1.7           | 1.9\$          | 2.7            | 3.9            | 5.0            | 5.7            | 6.1            |
| Pulmonary bacterial infection                    | 4.8*         | 2.4\$         | 3.7\$         | 6.5\$          | 9.4\$          | 11.3           | 8.7            | 4.0\$          | 3.6\$          |
| Immunocompromised                                | 3.4          | 1.4\$         | 1.6\$         | 2.5\$          | 3.7\$          | 5.9\$          | 5.8            | 3.1*           | 1.2            |
| <b>Complications</b>                             |              |               |               |                |                |                |                |                |                |
| Acute respiratory failure                        | 12.1*        | 5.4           | 12.1*         | 19.2*          | 27.3*          | 33.8*          | 33.4*          | 30.8*          | 28.3*          |
| Pulmonary embolism                               | 0.4*         | 1.2*          | 2.0*          | 3.3*           | 4.5*           | 5.3*           | 4.0*           | 2.4*           | 2.0*           |
| Venous thrombosis (including pulmonary embolism) | 0.6*         | 1.8*          | 2.7*          | 4.5*           | 6.4*           | 7.4*           | 5.6*           | 3.6*           | 3.0*           |

|                       |      |       |       |       |       |       |        |        |        |
|-----------------------|------|-------|-------|-------|-------|-------|--------|--------|--------|
| Septic shock          | 0.7* | 0.5   | 0.9\$ | 2.0\$ | 3.8   | 5.5*  | 4.2*   | 1.2    | 0.6    |
| Myocardial infarction | 0    | 0     | 0.1   | 0.3   | 0.5\$ | 0.8\$ | 0.8\$  | 0.9\$  | 0.9\$  |
| Atrial fibrillation   | 0    | 0.2   | 0.3   | 1.2\$ | 3.0\$ | 8.8\$ | 17.2\$ | 25.7\$ | 29.2\$ |
| Stroke                | 0.2  | 0.2   | 0.3   | 0.5   | 0.9\$ | 1.5   | 1.5    | 1.7    | 1.6    |
| Acute kidney failure  | 1.6* | 0.7\$ | 1.6\$ | 3.1\$ | 5.8\$ | 9.0*  | 9.5*   | 7.1*   | 6.3    |

### Seasonal Influenza

| Age class (years)             | <18           | 18-30         | 31-40         | 41-50           | 51-60           | 61-70          | 71-80          | 81-90          | >90            |
|-------------------------------|---------------|---------------|---------------|-----------------|-----------------|----------------|----------------|----------------|----------------|
| N                             | 8,942         | 1,836         | 1,568         | 1,626           | 3,164           | 5,624          | 7,693          | 11,276         | 4,090          |
| Social deprivation score      | -0.04 +/- 1.4 | -0.2 +/- 1.6* | -0.3 +/- 1.7* | -0.03 +/- 1.5\$ | -0.04 +/- 1.5\$ | -0.1 +/- 1.5\$ | -0.2 +/- 1.6\$ | -0.2 +/- 1.6\$ | -0.5 +/- 1.7\$ |
| <b>Comorbidity scores</b>     |               |               |               |                 |                 |                |                |                |                |
| Charlson score                | 0.1 +/- 0.5*  | 0.3 +/- 0.8\$ | 0.5 +/- 1.2\$ | 1.0 +/- 1.8\$   | 1.5 +/- 2.0\$   | 1.8 +/- 2.1\$  | 1.8 +/- 2.0\$  | 1.6 +/- 1.8*   | 1.5 +/- 1.6    |
| Elixhauser score              | 0.3 +/- 2.6*  | 0.5 +/- 0.9\$ | 0.8 +/- 1.1\$ | 1.5 +/- 1.6\$   | 2.1 +/- 1.9\$   | 2.5 +/- 2.1\$  | 2.7 +/- 2.1    | 2.8 +/- 2.0    | 2.8 +/- 1.9\$  |
| <b>Comorbidities</b>          |               |               |               |                 |                 |                |                |                |                |
| Hypertension                  | 0.2*          | 1.5           | 3.9           | 11.3            | 21.2*           | 32.2*          | 41.0*          | 45.8*          | 44.6*          |
| Dementia                      | 0             | 0             | 0             | 0.2             | 0.6\$           | 1.8            | 7.6            | 16.1*          | 20.2*          |
| HIV                           | 0             | 0.3           | 1.6\$         | 3.0\$           | 1.7\$           | 0.7            | 0.3            | 0.1\$          | 0              |
| Heart failure                 | 0.2*          | 0.6           | 1.1           | 3.4\$           | 6.8\$           | 10.7\$         | 16.2\$         | 24.5\$         | 32.9\$         |
| Chronic respiratory disease   | 0.4*          | 1.4\$         | 1.3\$         | 3.7\$           | 6.0\$           | 8.0\$          | 6.5\$          | 4.2\$          | 1.9            |
| Chronic kidney disease        | 0.2           | 0.8\$         | 2.4           | 3.9\$           | 5.1\$           | 8.2\$          | 11.2           | 13.9*          | 15.5           |
| Cirrhosis                     | 0.02          | 0.3           | 0.6\$         | 1.7\$           | 3.5\$           | 3.0\$          | 1.4            | 0.4            | 0.3            |
| Diabetes                      | 0.8           | 5.9\$         | 7.5\$         | 10.4            | 16.7            | 23.9*          | 27.3*          | 21.0*          | 13.2           |
| Peripheral vascular disease   | 0.1           | 0.2           | 0.3           | 0.9             | 3.3\$           | 5.8\$          | 5.5            | 4.8            | 4.7            |
| Overweight                    | 0.1*          | 4.1*          | 6.3*          | 10.2*           | 10.8*           | 11.4*          | 9.4*           | 5.8            | 2.5            |
| Body mass index (BMI)         | 0.1*          | 3.7*          | 5.4*          | 9.5*            | 9.5*            | 10.5*          | 8.4*           | 5.0            | 2.0            |
| Dyslipidemia                  | 0.02          | 0             | 0.5           | 2.3\$           | 4.0             | 7.2            | 7.4*           | 6.7            | 4.3            |
| Deficiency Anemia             | 1.2           | 1.9\$         | 2.1           | 3.3\$           | 3.3             | 4.1            | 5.2            | 6.3\$          | 6.7            |
| Pulmonary bacterial infection | 2.0*          | 3.9\$         | 6.8\$         | 10.3\$          | 11.0\$          | 11.1           | 8.5            | 6.7\$          | 5.9\$          |
| Immunocompromised             | 2.6           | 3.2\$         | 5.2\$         | 7.1\$           | 8.9\$           | 8.5\$          | 6.0            | 2.5*           | 1.2            |
| <b>Complications</b>          |               |               |               |                 |                 |                |                |                |                |
| Acute respiratory failure     | 7.5*          | 6.4           | 9.2*          | 17.0*           | 25.1*           | 26.4*          | 21.9*          | 18.1*          | 18.4*          |
| Pulmonary embolism            | 0*            | 0.2*          | 0.6*          | 1.0*            | 1.3*            | 1.2*           | 1.4*           | 1.1*           | 1.1*           |

|                                                  |      |       |       |       |       |        |        |        |        |
|--------------------------------------------------|------|-------|-------|-------|-------|--------|--------|--------|--------|
| Venous thrombosis (including pulmonary embolism) | 0.1* | 0.5*  | 1.1*  | 2.1*  | 2.6*  | 2.6*   | 2.3*   | 1.9*   | 2.0*   |
| Septic shock                                     | 0.2* | 0.8   | 1.6\$ | 3.6\$ | 4.3   | 4.1*   | 3.3*   | 1.5    | 0.4    |
| Myocardial infarction                            | 0.01 | 0     | 0.3   | 0.5   | 1.0\$ | 1.7\$  | 1.5\$  | 1.7\$  | 1.6\$  |
| Atrial fibrillation                              | 0.01 | 0.2   | 0.3   | 2.3\$ | 6.0\$ | 12.2\$ | 21.4\$ | 29.6\$ | 32.3\$ |
| Stroke                                           | 0.1  | 0.1   | 0.4   | 0.7   | 1.4\$ | 1.6    | 1.7    | 1.8    | 2.0    |
| Acute kidney failure                             | 0.3* | 1.4\$ | 2.4\$ | 4.2\$ | 7.1\$ | 7.3*   | 6.4*   | 6.3*   | 5.8    |

\* significantly more frequent in the COVID-19 group (p<0.05)

\$ significantly more frequent in the seasonal influenza group (p<0.05)

**Supplementary Table 2: Case fatality rates by main comorbidities of patients hospitalized in France for COVID-19 (from March 1st, 2020, to April 30th, 2020) or seasonal influenza (from December 1st, 2018, to February 28th, 2019)**

|           | Hypertension | Dementia | HIV   | Heart failure | Chronic respiratory disease | Chronic kidney disease | Diabetes | Peripheral vascular disease | Overweight | BMI   | Deficiency Anemia | Pulmonary bacterial infection | Immunocompromised |
|-----------|--------------|----------|-------|---------------|-----------------------------|------------------------|----------|-----------------------------|------------|-------|-------------------|-------------------------------|-------------------|
| COVID-19  | 30.5%        | 30.5%    | 11.6% | 31.5%         | 28.8%                       | 28.5%                  | 22.2%    | 27.6%                       | 14.8%      | 15.0% | 14.5%             | 25.4%                         | 27.4%             |
| Influenza | 11.1%        | 11.1%    | 3.4%  | 13.67%        | 11.0%                       | 10.0%                  | 6.6%     | 9.4%                        | 5.4%       | 5.5%  | 5.1%              | 13.9%                         | 10.6%             |

**Supplementary Table 3: Crude in-hospital case fatality rates in the whole population of patients hospitalized in France for COVID-19 (from March 1st, 2020, to April 30th, 2020) or seasonal influenza (from December 1st, 2018, to February 28th, 2019), according to their age at admission**

| <b>COVID-19</b>               |               |              |              |                |              |                |                |                |                |
|-------------------------------|---------------|--------------|--------------|----------------|--------------|----------------|----------------|----------------|----------------|
| <b>Age class (years)</b>      | <b>&lt;18</b> | <b>18-30</b> | <b>31-40</b> | <b>41-50</b>   | <b>51-60</b> | <b>61-70</b>   | <b>71-80</b>   | <b>81-90</b>   | <b>&gt;90</b>  |
| Number                        | 1,227         | 4,384        | 6,065        | 8,892          | 13,110       | 15,345         | 16,265         | 17,841         | 6,401          |
| Males (%)                     | 52.9          | 38.3 *       | 45.5 *       | 54.4           | 59.1 *       | 61.8 *         | 60.5 *         | 47.2 *         | 32.8           |
| Intensive care support (n, %) | 36 (2.9) *    | 258 (5.9)    | 625 (10.3)   | 1,414 (15.9) § | 3,045 (23.2) | 4,322 (28.2) * | 3,526 (21.7) * | 1,172 (6.6) §  | 187 (2.9)      |
| In-hospital death (n, %)      | 9 (0.7) *     | 20 (0.5)     | 84 (1.4)     | 237 (2.7)      | 796 (6.1) *  | 2,103 (13.7) * | 3,750 (23.1) * | 5,783 (32.4) * | 2,322 (36.3) * |

  

| <b>Seasonal influenza</b>     |               |              |              |              |              |                |                |               |               |
|-------------------------------|---------------|--------------|--------------|--------------|--------------|----------------|----------------|---------------|---------------|
| <b>Age class (years)</b>      | <b>&lt;18</b> | <b>18-30</b> | <b>31-40</b> | <b>41-50</b> | <b>51-60</b> | <b>61-70</b>   | <b>71-80</b>   | <b>81-90</b>  | <b>&gt;90</b> |
| Number                        | 8,942         | 1,836        | 1,568        | 1,626        | 3,164        | 5,624          | 7,693          | 11,276        | 4,090         |
| Males (%)                     | 54.7          | 29.8 *       | 34.1 *       | 52.0         | 54.7 *       | 56.0 *         | 55.0 *         | 43.5 *        | 31.6          |
| Intensive care support (n, %) | 116 (1.3) *   | 132 (7.2)    | 181 (11.5)   | 307 (18.9) § | 710 (22.4)   | 1,189 (21.1) * | 1,214 (15.8) * | 950 (8.4) §   | 127 (3.1)     |
| In-hospital death (n, %)      | 16 (0.2) *    | 12 (0.7)     | 17 (1.1)     | 39 (2.4)     | 140 (4.4) *  | 338 (6.0) *    | 498 (6.5) *    | 1,014 (9.0) * | 566 (13.8) *  |

\* significantly more frequent in the COVID-19 group ( $p < 0.05$ )

§ significantly more frequent in the seasonal influenza group ( $p < 0.05$ )

**Supplementary Figure 1: Case fatality rates of patients hospitalized in France for COVID-19 (from March 1<sup>st</sup>, 2020, to April 30<sup>th</sup>, 2020) or seasonal influenza (from December 1<sup>st</sup>, 2018, to February 28<sup>th</sup>, 2019), according to their age at admission and gender**

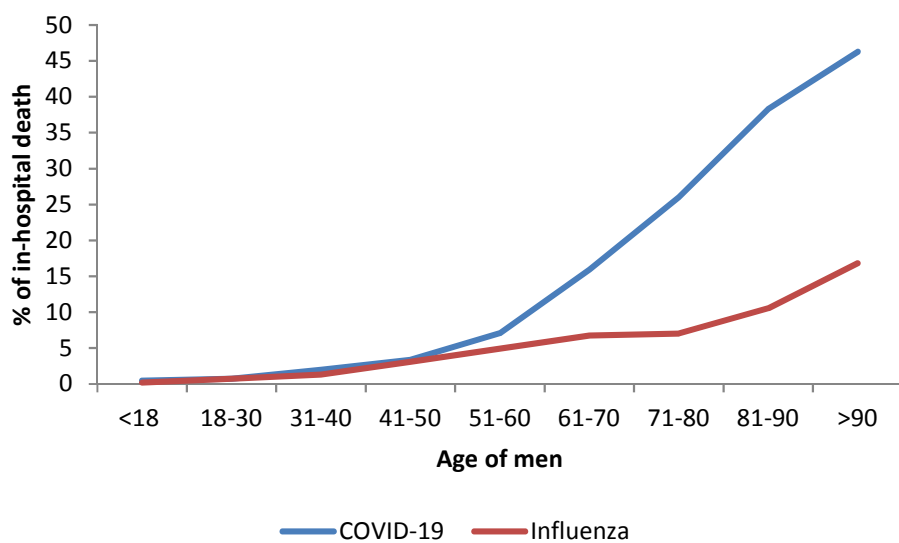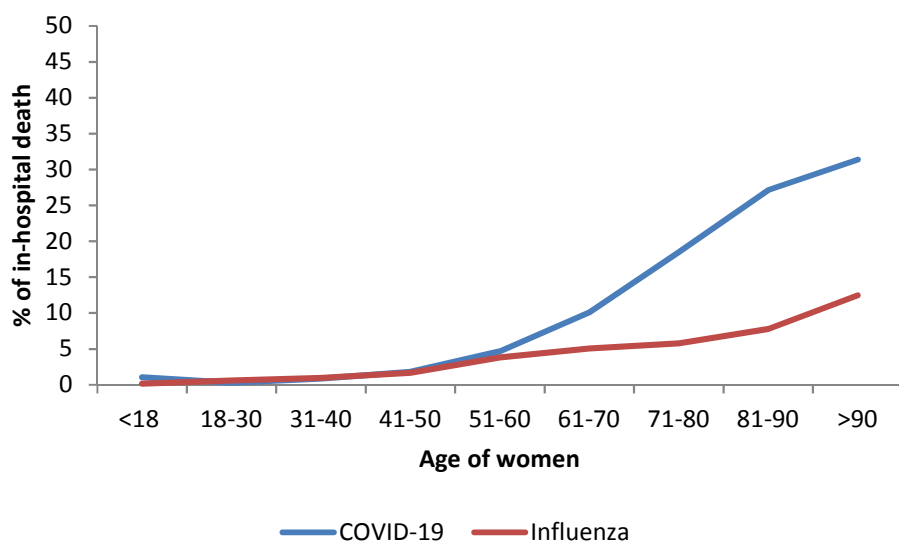

**Supplementary Table 4: Crude in-hospital case fatality rates in the pediatric population (under 18 years) hospitalized in France for COVID-19 (from March 1st, 2020, to April 30th, 2020) or seasonal influenza (from December 1st, 2018, to February 28th, 2019), according to their age at admission**

| <b>COVID-19</b>               |              |            |            |             |              |
|-------------------------------|--------------|------------|------------|-------------|--------------|
| <b>Age class (years)</b>      | <b>&lt;1</b> | <b>1-5</b> | <b>0-5</b> | <b>6-10</b> | <b>11-17</b> |
| Number                        | 365          | 248        | 613        | 156         | 458          |
| Males (%)                     | 60.0         | 54.8       | 57.9       | 57.7        | 44.5 §       |
| Intensive care support (n, %) | 5 (1.4) *    | 9 (3.6) *  | 14 (2.3) * | 3 (1.9)     | 19 (4.2)     |
| In-hospital death (n, %)      | 1 (0.3)      | 2 (0.8)    | 3 (0.5)    | 1 (0.6)     | 5 (1.1) *    |

| <b>Seasonal influenza</b>     |              |            |            |             |              |
|-------------------------------|--------------|------------|------------|-------------|--------------|
| <b>Age class (years)</b>      | <b>&lt;1</b> | <b>1-5</b> | <b>0-5</b> | <b>6-10</b> | <b>11-17</b> |
| Number                        | 2,707        | 4,266      | 6,973      | 1,165       | 804          |
| Males (%)                     | 56.5         | 52.9       | 54.3       | 57.7        | 54.0 §       |
| Intensive care support (n, %) | 9 (0.3) *    | 56 (1.3) * | 65 (0.9) * | 16 (1.4)    | 35 (4.4)     |
| In-hospital death (n, %)      | 4 (0.2)      | 9 (0.2)    | 13 (0.2)   | 2 (0.2)     | 1 (0.1) *    |

\* significantly more frequent in the COVID-19 group ( $p < 0.05$ )

§ significantly more frequent in the seasonal influenza group ( $p < 0.05$ )



**Supplementary Figure 2: Case fatality rates of children hospitalized in France for COVID-19 (from March 1<sup>st</sup>, 2020, to April 30<sup>th</sup>, 2020) or seasonal influenza (from December 1<sup>st</sup>, 2018, to February 28<sup>th</sup>, 2019), according to their age at admission and gender**

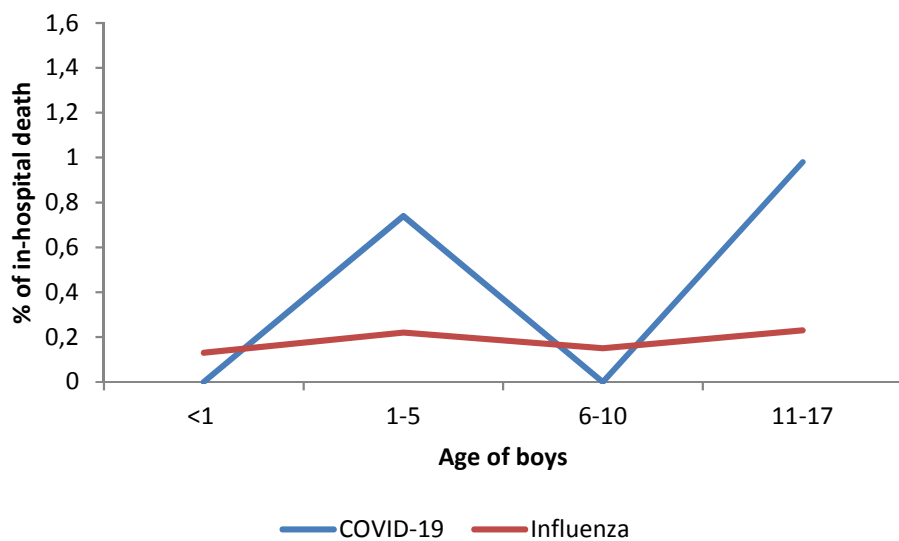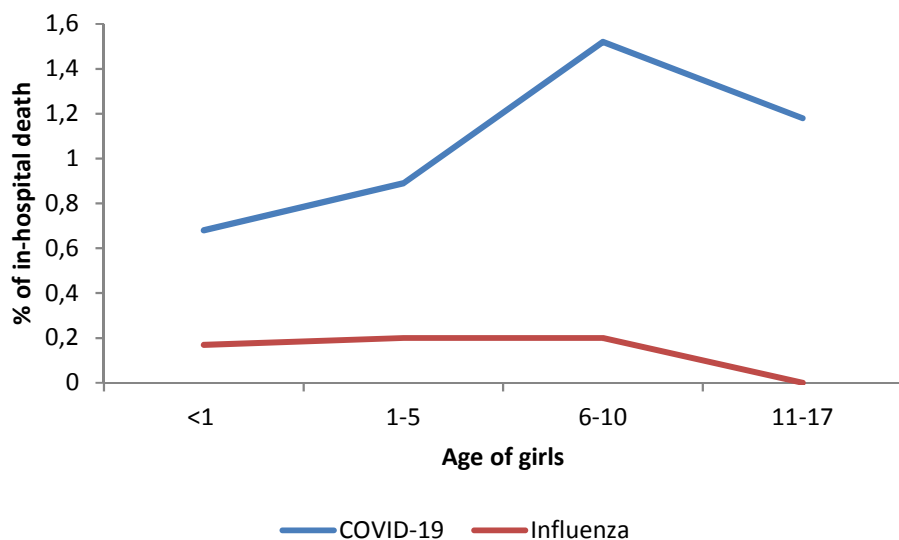

**Supplementary Table 5: Main baseline comorbidities (%) in the pediatric population (under 18 years) hospitalized in France for COVID-19 (from March 14<sup>th</sup>, 2020, to April 30<sup>th</sup>, 2020) or seasonal influenza (from December 1<sup>st</sup>, 2018, to February 28<sup>th</sup>, 2019), according to their age at admission**

| <b>COVID-19</b>             |        |        |        |        |         |
|-----------------------------|--------|--------|--------|--------|---------|
| <b>Age class (years)</b>    | <1     | 1-5    | 0-5    | 6-10   | 11-17   |
| <b>N</b>                    | 365    | 248    | 613    | 156    | 458     |
| Hypertension                | 0      | 0·81   | 0·33   | 1·28   | 0·44    |
| Dementia                    | 0      | 0      | 0      | 0      | 0·22    |
| HIV                         | 0      | 0      | 0      | 0      | 0       |
| Heart failure               | 0·27   | 0·40   | 0·33   | 3·85 * | 1·75    |
| Chronic respiratory disease | 1·1 *  | 0·81   | 0·98 * | 0·64   | 0·66 \$ |
| Cirrhosis                   | 0      | 0·40   | 0·16   | 0      | 0       |
| Diabetes                    | 0      | 0·40   | 0·16   | 0      | 1·53 \$ |
| Peripheral vascular disease | 0      | 0      | 0      | 0      | 0       |
| Dyslipidemia                | 0      | 0      | 0      | 0      | 0       |
| Deficiency anaemia          | 2·19   | 3·63 * | 2·77 * | 1·28   | 0·44    |
| Immunocompromised           | 2·47 * | 4·44   | 3·26 * | 3·85   |         |
| Overweight                  | 0      | 0      | 0      | 0      | 3·49 *  |
| Obese                       | 0      | 0      | 0      | 0      | 2·62 *  |

| <b>Seasonal influenza</b>   |        |        |        |      |         |
|-----------------------------|--------|--------|--------|------|---------|
| <b>Age class (years)</b>    | <1     | 1-5    | 0-5    | 6-10 | 11-17   |
| <b>N</b>                    | 2707   | 4266   | 6973   | 1165 | 804     |
| Hypertension                | 0      | 0·23   | 0·14   | 0·26 | 0·5     |
| Dementia                    | 0      | 0      | 0      | 0    | 0       |
| HIV                         | 0      | 0      | 0      | 0    | 0       |
| Heart failure               | 0·15   | 0·16   | 0·16   | 0 *  | 0·62    |
| Chronic respiratory disease | 0·07 * | 0·14   | 0·11 * | 0·52 | 2·11 \$ |
| Cirrhosis                   | 0      | 0·02   | 0·01   | 0    | 0·12    |
| Diabetes                    | 0      | 0·52   | 0·32   | 1·72 | 4·1 \$  |
| Peripheral vascular disease | 0·07   | 0      | 0·03   | 0·26 | 0·12    |
| Dyslipidemia                | 0      | 0·02   | 0·01   | 0·09 | 0       |
| Deficiency anaemia          | 1·29   | 1·24 * | 1·26 * | 0·60 | 1·24    |
| Immunocompromised           | 1·15 * | 2·60   | 2·04 * | 4·12 |         |
| Overweight                  | 0      | 0·02   | 0·01   | 0·17 | 1·12 *  |
| Obese                       | 0      | 0·02   | 0·01   | 0    | 0·5 *   |

\* significantly more frequent in the COVID-19 group (p<0·05)

\$ significantly more frequent in the seasonal influenza group (p<0·05)

**Supplementary Table 6: Main baseline characteristics of patients hospitalized in France for COVID-19 (from March 14<sup>th</sup>, 2020, to April 30<sup>th</sup>, 2020) or seasonal influenza (from December 1<sup>st</sup>, 2018, to February 28<sup>th</sup>, 2019)**

|                                 | <b>COVID-19</b>      | <b>2018-2019 seasonal influenza</b> | <b>p-value</b> |
|---------------------------------|----------------------|-------------------------------------|----------------|
| <b>Number of patients</b>       | 85,440               | 45,819                              |                |
| <b>Males (n, %)</b>             | 45,345 (53.1%)       | 22,118 (48.3%)                      | <0.0001        |
| <b>Age</b>                      |                      |                                     | <0.0001        |
| Mean+/-std                      | 65 +/- 20            | 59 +/- 32                           |                |
| Med [Q1-Q3]                     | 68 [52-82]           | 71 [34-84]                          |                |
| Min-Max                         | 0-106                | 0-108                               |                |
| <18                             | 1,143 (1.3%)         | 8,942 (19.5)                        |                |
| 18-30                           | 4,164 (4.9)          | 1,836 (4.0)                         |                |
| 31-40                           | 5,806 (6.8)          | 1,568 (3.4)                         |                |
| 41-50                           | 8,554 (10.0)         | 1,626 (3.6)                         |                |
| 51-60                           | 12,591 (14.7)        | 3,164 (6.9)                         |                |
| 61-70                           | 14,633 (17.1)        | 5,624 (12.3)                        |                |
| 71-80                           | 15,439 (18.1)        | 7,693 (16.8)                        |                |
| 81-90                           | 16,996 (19.9)        | 11,276 (24.6)                       |                |
| >90                             | 6,114 (7.2)          | 4,090 (8.9)                         |                |
| <b>Social deprivation score</b> |                      |                                     |                |
| Mean+/-std                      | -0.26 +/- 1.78       | -0.17 +/- 1.56                      | <0.0001        |
| Med [Q1-Q3]                     | -0.14 [-1.23 - 0.93] | -0.01 [-0.96 - 0.87]                |                |
| Lowest                          | 21,895 (26.9)        | 9,195 (21.2)                        | <0.0001        |
| Second                          | 19,681 (24.2)        | 11,223 (25.9)                       |                |
| Third                           | 19,008 (23.4)        | 12,608 (29.1)                       |                |
| Highest                         | 20,767 (25.5)        | 10,256 (23.7)                       |                |
| <b>Comorbidity scores</b>       |                      |                                     |                |
| <b>Charlson</b>                 |                      |                                     |                |
| Mean+/-std                      | 17.17 +/- 1.82       | 1.23 +/- 1.78                       | <0.0001        |
| Med [Q1-Q3]                     | 0 [0-2]              | 1 [0-2]                             |                |
| 0                               | 43,373 (50.8)        | 21,715 (47.4)                       | <0.0001        |
| 1                               | 18,922 (22.2)        | 10,539 (23.0)                       |                |
| 2                               | 10,055 (11.8)        | 6,132 (13.4)                        |                |
| >=3                             | 13,090 (15.3)        | 7,433 (16.2)                        |                |
| <b>Elixhauser</b>               |                      |                                     |                |
| Mean+/-std                      | 2.00 +/- 1.95        | 2.01 +/- 2.03                       | 0.8389         |
| Med [Q1-Q3]                     | 2 [0-3]              | 2 [0-3]                             |                |
| 0                               | 24,499 (28.7)        | 14,080 (30.7)                       | <0.0001        |
| 1                               | 16,732 (19.6)        | 8,691 (19.0)                        |                |
| 2                               | 14,860 (17.4)        | 7,280 (15.9)                        |                |
| >=3                             | 29,349 (34.4)        | 15,768 (34.4)                       |                |
| <b>Comorbidities</b>            |                      |                                     |                |
| Hypertension                    | 28,337 (33.2)        | 12,921 (28.2)                       | <0.0001        |
| Dementia                        | 6,458 (7.6)          | 3,345 (7.3)                         | 0.0900         |
| HIV                             | 419 (0.5)            | 205 (0.5)                           | 0.2804         |
| Heart failure                   | 6,681 (7.8)          | 6,266 (13.7)                        | <0.0001        |
| Chronic respiratory disease     | 1,345 (1.6)          | 1,830 (4.0)                         | <0.0001        |
| Chronic kidney disease          | 6,996 (8.2)          | 3,821 (8.3)                         | 0.3425         |

|                               |               |              |         |
|-------------------------------|---------------|--------------|---------|
| Cirrhosis                     | 684 (0.8)     | 489 (1.1)    | <0.0001 |
| Diabetes                      | 16,297 (19.1) | 7,352 (16.1) | <0.0001 |
| Peripheral vascular disease   | 2,705 (3.2)   | 1,614 (3.5)  | 0.0006  |
| Overweight                    | 9,762 (11.4)  | 2,811 (6.1)  | <0.0001 |
| Body mass index (BMI)         | 8,303 (9.7)   | 2,491 (5.4)  | <0.0001 |
| 30-40                         | 7,171 (8.4)   | 2,078 (4.5)  | <0.0001 |
| 40-50                         | 2,286 (2.7)   | 706 (1.5)    |         |
| >50                           | 1,337 (1.6)   | 192 (0.4)    |         |
| Dyslipidemia                  | 4,262 (5.0)   | 2,072 (4.5)  | 0.0002  |
| Deficiency Anemia             | 3,277 (3.8)   | 1,946 (4.3)  | 0.0003  |
| Pulmonary bacterial infection | 5,876 (6.9)   | 3,142 (6.9)  | 0.8918  |
| Immunocompromised             | 3,154 (3.7)   | 2,033 (4.4)  | <0.0001 |

**Supplementary Table 7: Main outcomes of patients hospitalized in France for COVID-19 (from March 14<sup>th</sup>, 2020, to April 30<sup>th</sup>, 2020) or seasonal influenza (from December 1<sup>st</sup>, 2018, to February 28<sup>th</sup>, 2019)**

|                                                                                               | <b>COVID-19</b> | <b>2018-2019 seasonal influenza</b> | <b>p-value</b> |
|-----------------------------------------------------------------------------------------------|-----------------|-------------------------------------|----------------|
| <b>Number of patients</b>                                                                     | 85,440          | 45,819                              |                |
| Acute respiratory failure                                                                     | 23,044 (27.0)   | 7,977 (17.4)                        | <0.0001        |
| Pulmonary embolism                                                                            | 2,985 (3.5)     | 412 (0.9)                           | <0.0001        |
| Venous thrombosis (including pulmonary embolism)                                              | 4,208 (4.9)     | 766 (1.7)                           | <0.0001        |
| Septic shock                                                                                  | 2,346 (2.8)     | 918 (2.0)                           | <0.0001        |
| Myocardial infarction                                                                         | 523 (0.6)       | 506 (1.1)                           | <0.0001        |
| Atrial fibrillation                                                                           | 10,552 (12.4)   | 7,222 (15.8)                        | <0.0001        |
| Stroke                                                                                        | 1,003 (1.2)     | 569 (1.2)                           | 0.2809         |
| Hemorrhagic stroke                                                                            | 245 (0.3)       | 93 (0.2)                            | 0.0043         |
| Ischemic stroke                                                                               | 668 (0.8)       | 405 (0.9)                           | 0.0503         |
| Transient Ischemic Attack                                                                     | 146 (0.2)       | 92 (0.2)                            | 0.2247         |
| Acute kidney failure                                                                          | 5,340 (6.3)     | 2,227 (4.9)                         | <0.0001        |
| Invasive mechanical ventilation                                                               | 8,162 (9.6)     | 1,833 (4.0)                         | <0.0001        |
| Intensive care support                                                                        | 13,726 (16.1)   | 4,926 (10.8%)                       | <0.0001        |
| Mean stay in ICU (days, +/- SD)                                                               | 15 +/- 14       | 8 +/- 9                             | <0.0001        |
| Median stay in ICU (days, Q1-Q3)                                                              | 10 [4-21]       | 5 [2-10]                            | <0.0001        |
| Mechanical ventilation among ICU patients                                                     | 9,818 (71.5)    | 3,004 (61.0)                        | <0.0001        |
| In-hospital death                                                                             | 14,095 (16.5)   | 2,640 (5.8)                         | <0.0001        |
| In hospital death that would be expected with the same influenza age-specific mortality rates | 5,108 (6.0)     |                                     |                |
| Standardized mortality ratio (%)                                                              | 263             |                                     |                |
| In-hospital death among ICU patients                                                          | 3,618 (26.4)    | 885 (18.0)                          | <0.0001        |
| In-hospital death among ICU patients with mechanical ventilation                              | 3,037 (30.9)    | 780 (26.0)                          | <0.0001        |
| In-hospital death among ICU patients non ventilated                                           | 435 (16.6)      | 81 (5.4)                            | <0.0001        |

**Supplementary Table 8: Crude in-hospital case fatality rates in the whole population of patients hospitalized in France for COVID-19 (from March 14<sup>th</sup>, 2020, to April 30<sup>th</sup>, 2020) or seasonal influenza (from December 1<sup>st</sup>, 2018, to February 28<sup>th</sup>, 2019), according to their age at admission**

| <b>COVID-19</b>            |               |              |              |              |              |              |              |              |               |
|----------------------------|---------------|--------------|--------------|--------------|--------------|--------------|--------------|--------------|---------------|
| <b>Age class (years)</b>   | <b>&lt;18</b> | <b>18-30</b> | <b>31-40</b> | <b>41-50</b> | <b>51-60</b> | <b>61-70</b> | <b>71-80</b> | <b>81-90</b> | <b>&gt;90</b> |
| Number                     | 1,143         | 4,164        | 5,806        | 8,554        | 12,591       | 14,633       | 15,439       | 16,996       | 6,114         |
| Males (%)                  | 52.8          | 38.2 *       | 45.5 *       | 54.4         | 59.2 *       | 62.1 *       | 60.5 *       | 47.1 *       | 32.4          |
| Intensive care support (%) | 2.9*          | 5.8 \$       | 10.4         | 15.8 \$      | 23.1         | 28.0 *       | 21.2 *       | 6.1 \$       | 2.8           |
| In-hospital death (%)      | 0.7*          | 0.5          | 1.4          | 2.5          | 6.1 *        | 13.4 *       | 22.5 *       | 31.8 *       | 35.4 *        |

  

| <b>Seasonal influenza</b>  |               |              |              |              |              |              |              |              |               |
|----------------------------|---------------|--------------|--------------|--------------|--------------|--------------|--------------|--------------|---------------|
| <b>Age class (years)</b>   | <b>&lt;18</b> | <b>18-30</b> | <b>31-40</b> | <b>41-50</b> | <b>51-60</b> | <b>61-70</b> | <b>71-80</b> | <b>81-90</b> | <b>&gt;90</b> |
| Number                     | 8,942         | 1,836        | 1,568        | 1,626        | 3,164        | 5,624        | 7,693        | 11,276       | 4,090         |
| Males (%)                  | 54.7          | 29.8 *       | 34.1 *       | 52.0         | 54.7 *       | 56.0 *       | 55.0 *       | 43.5 *       | 31.6          |
| Intensive care support (%) | 1.3 *         | 7.2          | 11.5         | 18.9 \$      | 22.4         | 21.1 *       | 15.8 *       | 8.4 \$       | 3.1           |
| In-hospital death (%)      | 0.2 *         | 0.7          | 1.1          | 2.4          | 4.4 *        | 6.0 *        | 6.5 *        | 9.0 *        | 13.8 *        |

\* significantly more frequent in the COVID-19 group (p<0.05)

\$ significantly more frequent in the seasonal influenza group (p<0.05)

**Supplementary Table 9: Crude in-hospital case fatality rates in the pediatric population (under 18 years) hospitalized in France for COVID-19 (from March 14<sup>th</sup>, 2020, to April 30<sup>th</sup>, 2020) or seasonal influenza (from December 1st, 2018, to February 28th, 2019), according to their age at admission**

| <b>COVID-19</b>            |              |            |            |             |              |
|----------------------------|--------------|------------|------------|-------------|--------------|
| <b>Age class (years)</b>   | <b>&lt;1</b> | <b>1-5</b> | <b>0-5</b> | <b>6-10</b> | <b>11-17</b> |
| Number                     | 355          | 230        | 585        | 142         | 416          |
| Males (%)                  | 60.6         | 53.9       | 58.0       | 55.6        | 44.5 \$      |
| Intensive care support (%) | 5 (1.4) *    | 9 (3.9) *  | 14 (2.4) * | 2 (1.4)     | 17 (4.1)     |
| In-hospital death (%)      | 1 (0.3)      | 2 (0.9)    | 3 (0.5)    | 1 (0.7)     | 4 (1.0) *    |
| <b>Seasonal influenza</b>  |              |            |            |             |              |
| <b>Age class (years)</b>   | <b>&lt;1</b> | <b>1-5</b> | <b>0-5</b> | <b>6-10</b> | <b>11-17</b> |
| Number                     | 2,707        | 4,266      | 6,973      | 1,165       | 804          |
| Males (%)                  | 56.5         | 52.9       | 54.3       | 57.7        | 54.0 \$      |
| Intensive care support (%) | 9 (0.3) *    | 56 (1.3) * | 65 (0.9) * | 16 (1.4)    | 35 (4.4)     |
| In-hospital death (%)      | 4 (0.2)      | 9 (0.2)    | 13 (0.2)   | 2 (0.2)     | 1 (0.1) *    |

\* significantly more frequent in the COVID-19 group (p<0.05)

\$ significantly more frequent in the seasonal influenza group (p<0.05)
